# Supplementary material for: Nanoscale details of mitochondrial fission revealed by cryo-electron tomography
Source: bioRxiv or medRxiv preprint supplement (doi:10.1101/2021.12.13.472487), 2021-12-14
Supplement: Supplementary file [file media-1.pdf]

**Title: Nanoscale details of mitochondrial fission revealed by cryo-electron tomography**

**Authors:**

Mageswaran, Shrawan Kumar (1,2); Grotjahn, Danielle Ann (1,3); Zeng, Xiangrui (4); Barad, Benjamin Asher (3); Medina, Michaela (3); Hoang, My Hanh (2); Dobro, Megan J (5); Chang, Yi-Wei (2); Xu, Min (4); Yang, Wei Yuan (6); Jensen, Grant J. (1,7)

## Supplementary Figures

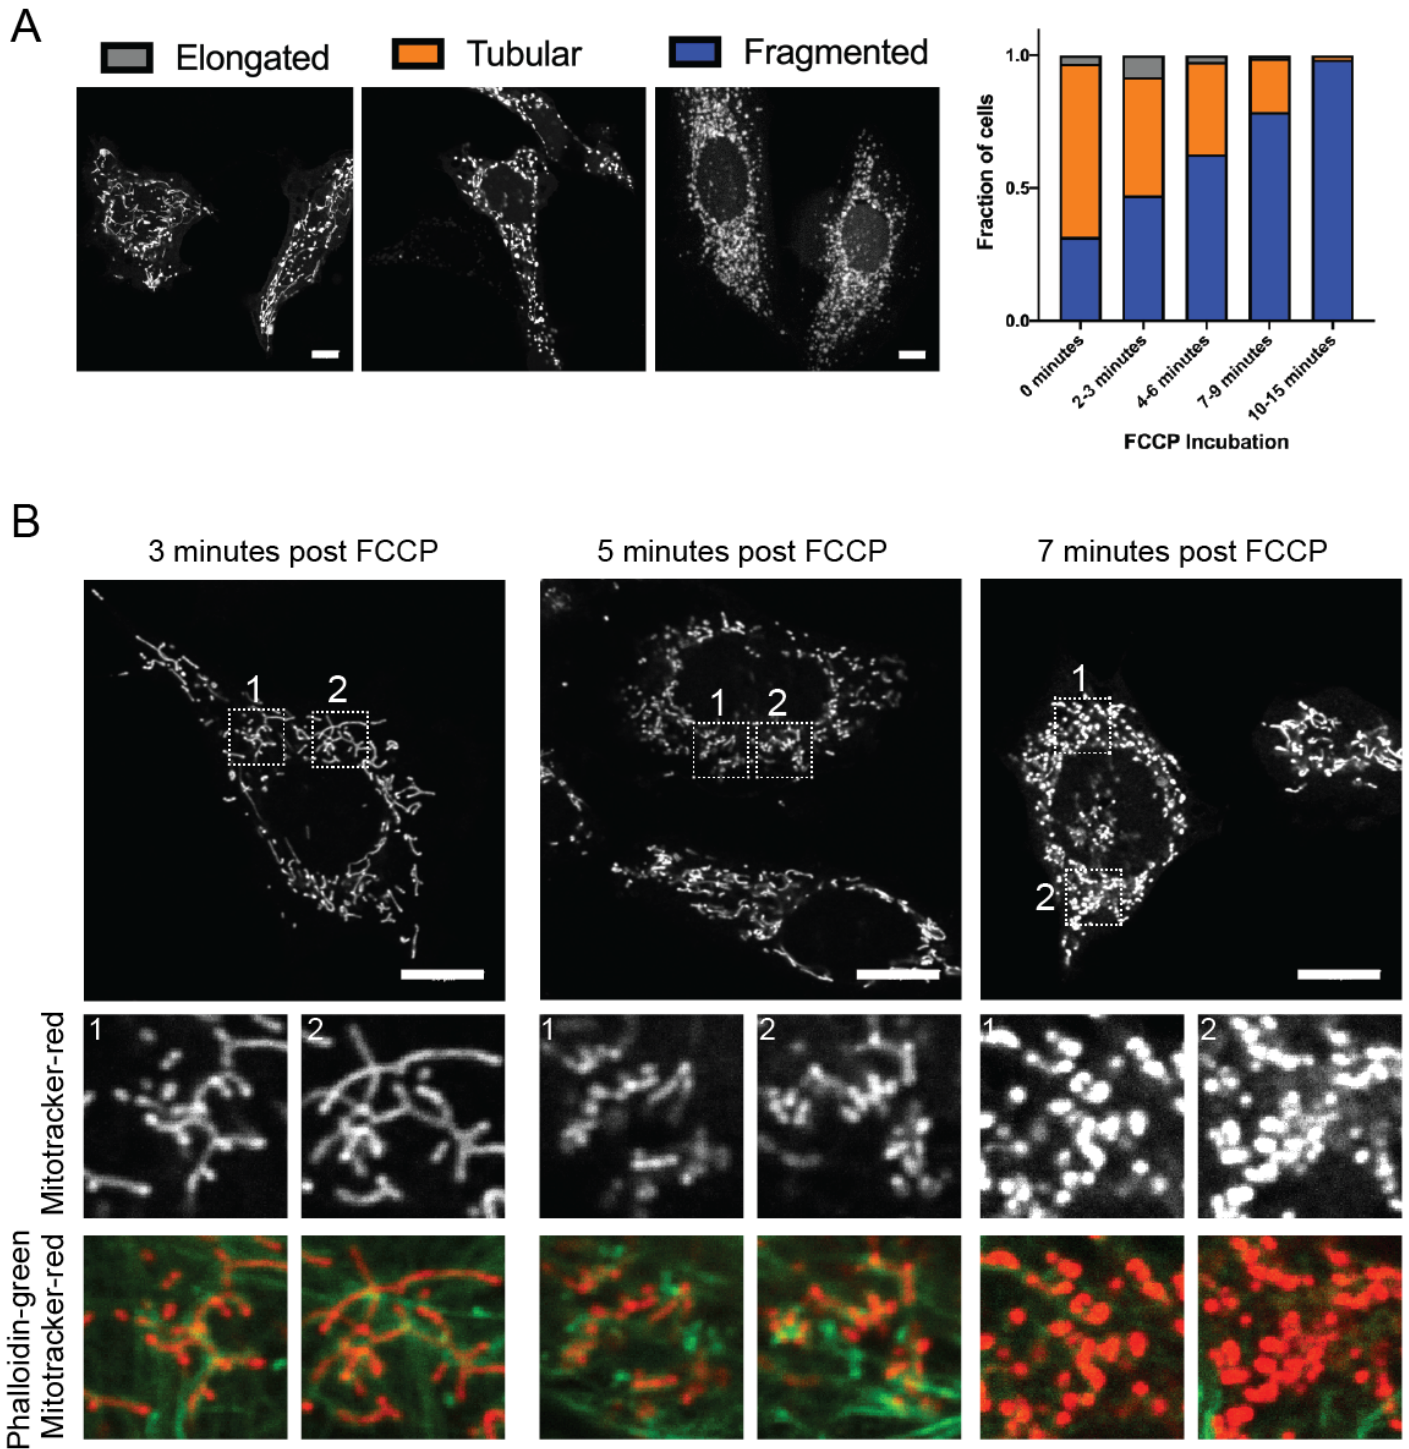

**Supplementary Figure 1. Temporal dynamics of FCCP-induced mitochondrial fission.** (A) Phenotypes of mitochondrial morphology (hyperfused, blue; intermediate, orange; and fragmented, gray) observed by fluorescence imaging of MitoTracker-Red-stained MEF cells following FCCP treatment. The percentage of cells exhibiting each phenotype at the indicated time after FCCP addition is shown at right. (B) Representative images of MitoTracker-Red-labeled cells at the indicated times after FCCP addition. Boxed regions are shown enlarged below, and overlaid with signal from phalloidin-labeled actin filaments (green). Scale bars are 10  $\mu$ m.

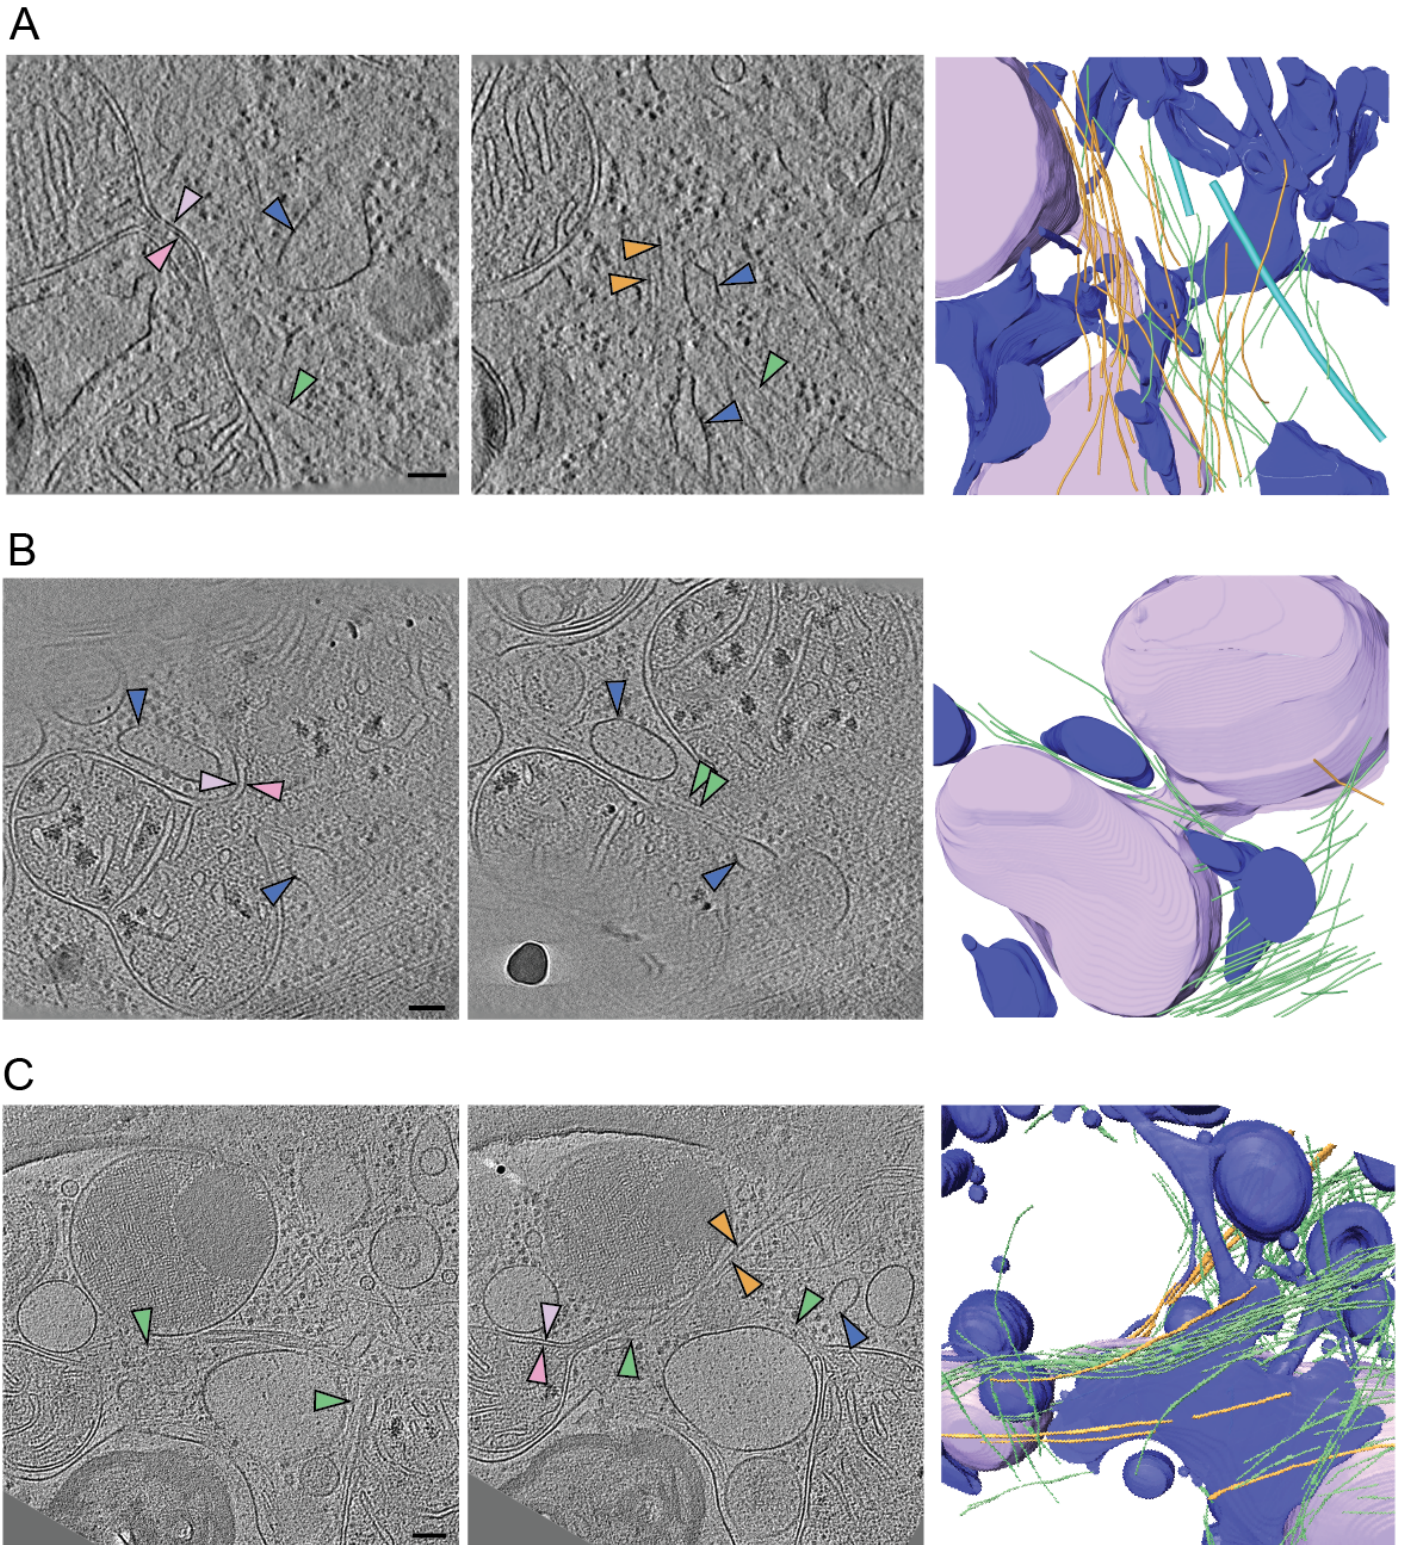

**Supplementary Figure 2. Ultrastructure of mitochondrial constriction sites is conserved across cell types, treatments.** Tomogram slices at different heights through constricting mitochondria and corresponding 3-D segmented models from **(A)** an FCCP-treated U2OS cell, **(B)** an untreated MEF cell, and **(C)** an untreated INS-1E cell. Visible features are color-coded as in other figures: OMM (purple), IMM (pink), ER (blue), F-actin (green), septin filaments (orange). Scale bars are 100 nm.
